# Supplementary material for: Ultra high stable supercapacitance performance of conducting polymer coated MnO2nanorods/rGO nanocomposites
Source: Royal Society of Chemistry journal article supplement (doi:10.1039/c7ra01743j), 2017-01-01
Supplement: c7ra01743j1.pdf [file c7ra01743j1.pdf]

## Supporting Information

### Ultra high stable supercapacitance performance of conducting polymer coated MnO<sub>2</sub> nanorods/rGO nanocomposites

K. Hareesh<sup>a, b,\*</sup>, B. Shateesh<sup>c</sup>, R.P. Joshi<sup>b</sup>, J. F. Williams<sup>a</sup>, D.M. Phase<sup>d</sup>, S.K.

Haram<sup>c,\*</sup>, S.D. Dhole<sup>b,\*</sup>

<sup>a</sup> School of Physics, University of Western Australia, Crawley, WA 6009,  
Australia

<sup>b</sup> Department of Physics, Savitribai Phule Pune University, Pune-411007, India

<sup>c</sup> Department of Chemistry, Savitribai Phule Pune University, Pune-411007,  
India

<sup>d</sup> UGC-DAE consortium for Scientific Research, Indore-452001, India

\*Corresponding authors:

appi.2907@gmail.com (KH)

haram@chem.unipune.ac.in (SKH)

sanjay@physics.unipune.ac.in (SDD)

**Fig. S1:**

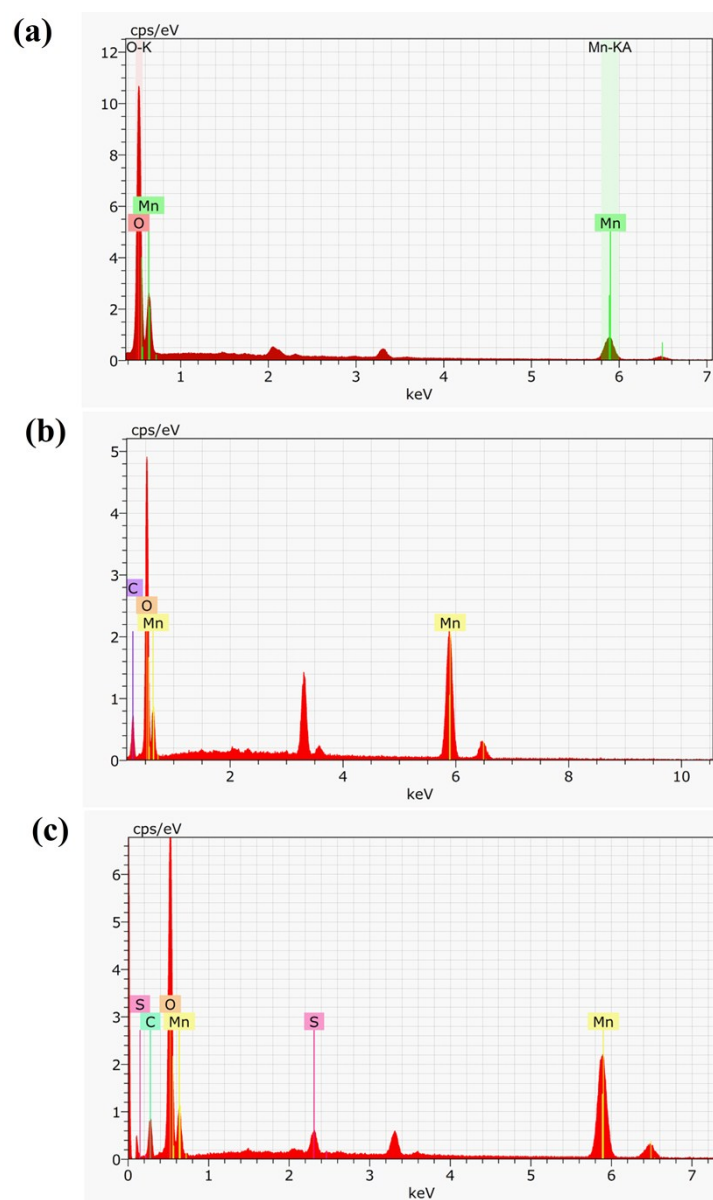

**Fig. S1.** EDS analysis of (a) MnO<sub>2</sub> nanorods, (b) MG and (c) MGP nanocomposite.

Fig. S2:

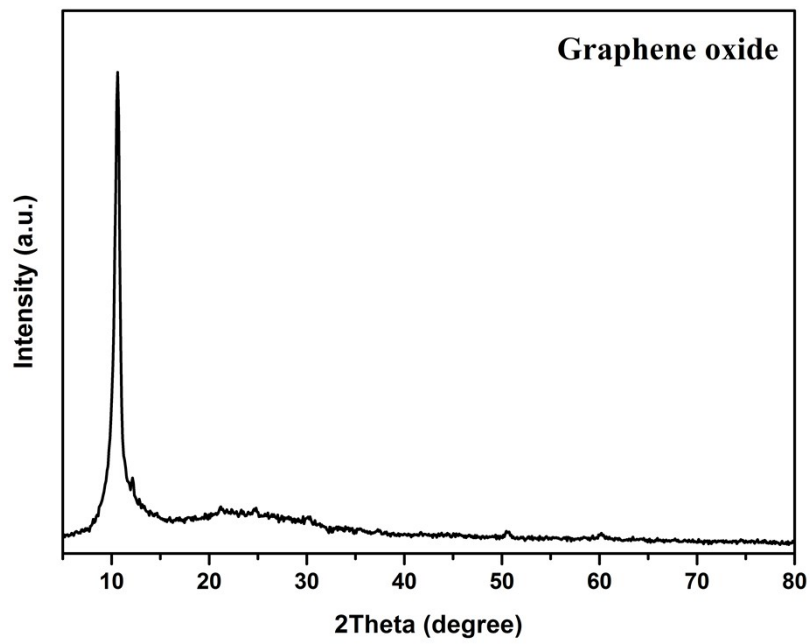

Fig. S2. XRD of graphene oxide.

Fig. S3:

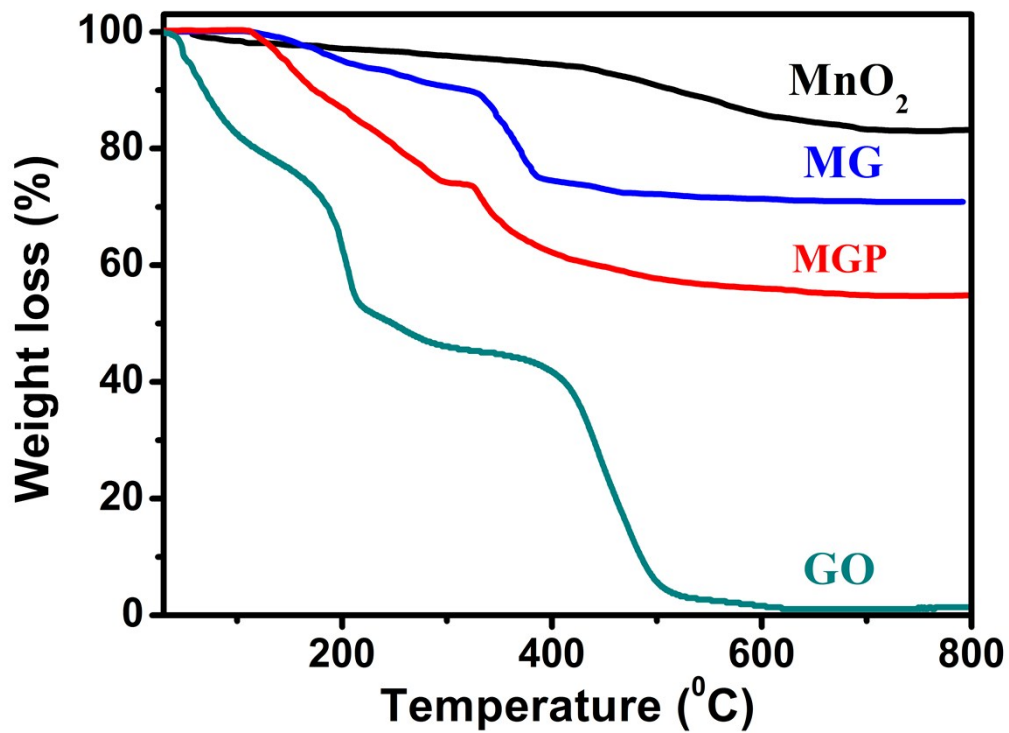

Fig. S3. TGA of GO, MnO<sub>2</sub>, MG and MGP nanocomposite.

**Fig. S4:**

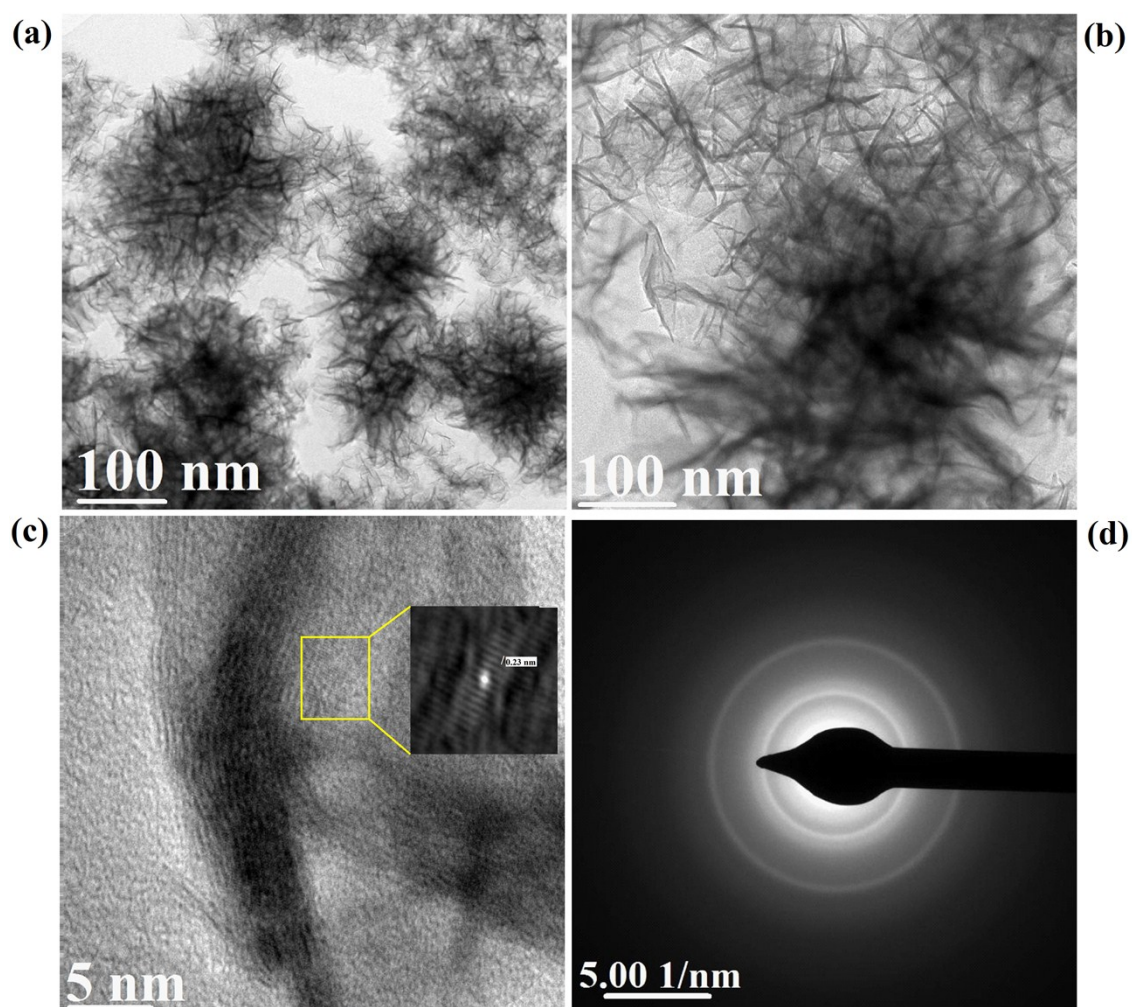

**Fig. S4.** TEM images of (a) MnO<sub>2</sub>-rGO, (b) PEDOT:PSS/MnO<sub>2</sub>/rGO, (c) HRTEM images of MnO<sub>2</sub>/rGO and (d) SAED pattern for MnO<sub>2</sub>/rGO.

Fig. S4 shows the TEM and HRTEM images of MnO<sub>2</sub>-rGO and PEDOT:PSS/MnO<sub>2</sub>/rGO. As can be seen from Fig. S4 (a), MnO<sub>2</sub> are decorated on rGO as flower like structure which is also supported by FESEM analysis. A thin coating of PEDOT:PSS polymer on this MnO<sub>2</sub>/rGO nanostructure can be seen in Fig. S4 (b). The HRTEM image of MnO<sub>2</sub>/rGO nanocomposite is shown in Fig S4 (c) and it shows the interlayer spacing as 0.23 nm, corresponding to (211) plane of MnO<sub>2</sub>, which is in agreement with XRD results. The SAED pattern (Fig. S4 (d)) reveals that the prepared MnO<sub>2</sub>/rGO is polycrystalline in nature.
